# Supplementary material for: Multisite imaging of neural activity using a genetically encoded calcium sensor in the honey bee
Source: PLoS Biol. 2023 Jan 31;21(1):e3001984. doi: 10.1371/journal.pbio.3001984 (PMC9917304; doi:10.1371/journal.pbio.3001984)
Supplement: S1 Data — Data underlying Fig 3. (XLSX) [file pbio.3001984.s009.xlsx]

## Sheet: intensity AL
bees	HB1	HB2	HB3	HB4	HB5	HB6	HB7	HB8	HB9	HB10	HB11
17ol475nm	0.160358	0.00947512	0.461911	0.163584	0.303875	0.158702	0.253415	0.370531	0.083744	0.289779	0.275292
18ol475nm	0.164653	0.0356684	0.302411	0.116824	0.253217	0.102623	0.168921	0.261873	0.0625293	0.191922	0.173366
19ol475nm	0.132451	0.0143242	0.203523	0.105628	0.15703	-0.0374179	0.1948	0.295684	0.0420261	0.0799769	0.0868391
26ol475nm	0.225455	0.101793	0.528532	0.150485	0.400148	0.28757	0.314568	0.59861	0.0918458	0.356861	0.293867
27ol475nm	0.235506	0.101283	0.60491	0.166746	0.376232	0.168977	0.291717	0.599316	0.10873	0.279867	0.241963
28ol475nm	0.228939	0.0426056	0.461205	0.132342	0.250383	0.0923721	0.289521	0.377654	0.0730759	0.219841	0.250604
29ol475nm	0.235593	0.0590011	0.526469	0.12253	0.234177	0.0673858	0.201509	0.314924	0.0495828	0.191289	0.163468
26one475nm	0.252031	0.122447	0.83361	0.217727	0.430861	0.144942	0.367605	0.549921	0.144157	0.142534	0.161792
27one475nm	0.200474	0.0687817	0.811882	0.185091	0.384965	0.161667	0.350185	0.448799	0.116714	0.319489	0.251472
28one475nm	0.206096	0.088748	0.492041	0.191899	0.350218	0.164753	0.258198	0.390802	0.0632565	0.2224	0.258448
29one475nm	0.19069	0.0718122	0.581589	0.0874072	0.304839	0.0136009	0.315041	0.304801	0.0827597	0.179559	0.230291
6al475nm	0.233693	0.131887	0.794941	0.230898	0.45084	0.195778	0.352494	0.438844	0.0820966	0.148359	0.0794667
7al475nm	0.400757	0.0823226	0.599814	0.229474	0.45744	0.220808	0.397724	0.48842	0.111449	0.293174	0.303703
8al475nm	0.311159	0.0912927	0.419684	0.192806	0.400179	0.159618	0.265009	0.393643	0.117898	0.318506	0.249713
9al475nm	0.182364	0.0773629	0.31392	0.206434	0.254696	0.109974	0.196292	0.423907	0.085515	0.182047	0.236897
air475nm	0.0204664	-0.0353319	0.172214	0.0412008	0.0498136	-0.0232709	0.0677058	0.197222	0.00720273	0.0157974	0.0764618
16ol475nm	0.251473	0.0908633	0.557335	0.123356	0.323119	0.176212	0.149953	0.459771	0.0686397	0.230147	0.301548

## Sheet: Euclidian distances AL
odor 1	odor 2	HB1	HB2	HB3	HB4	HB5	HB6	HB7	HB8	HB9	HB10	HB11
16ol	17ol	0.287162	0.224892	0.261133	0.150995	0.164842	0.315819	0.517693	0.199777	0.103554	0.272063	0.463778
16ol	18ol	0.246966	0.312303	0.307971	0.326959	0.239398	0.25086	0.439828	0.324964	0.103147	0.279774	0.558787
16ol	19ol	0.280817	0.321064	0.370506	0.244414	0.319326	0.37399	0.392818	0.265491	0.112366	0.306499	0.463186
16ol	26ol	0.335198	0.186831	0.246585	0.223192	0.235009	0.187548	0.467474	0.24041	0.0954601	0.208106	0.450834
16ol	27ol	0.19339	0.15863	0.184341	0.238017	0.241913	0.448039	0.462604	0.249696	0.132432	0.221229	0.48111
16ol	28ol	0.164206	0.300253	0.260101	0.2706	0.221241	0.294388	0.487096	0.268362	0.116903	0.246201	0.473793
16ol	29ol	0.204657	0.300875	0.233055	0.250266	0.2768	0.233554	0.541052	0.294811	0.100259	0.250284	0.497772
16ol	26one	0.248076	0.349658	0.418767	0.267904	0.250324	0.285128	0.431906	0.311044	0.168701	0.272493	0.471135
16ol	27one	0.190441	0.258501	0.378581	0.244859	0.264238	0.289413	0.520145	0.279816	0.143374	0.34699	0.550491
16ol	28one	0.271249	0.260272	0.22279	0.228599	0.239245	0.264961	0.544148	0.271108	0.118005	0.269707	0.479909
16ol	29one	0.270587	0.29741	0.223599	0.213683	0.280417	0.293778	0.37372	0.307546	0.114346	0.236483	0.546728
16ol	6al	0.255047	0.272164	0.304118	0.258438	0.250712	0.221386	0.507403	0.291468	0.112499	0.337925	0.693469
16ol	7al	0.300563	0.249193	0.32198	0.323692	0.27475	0.235858	0.606357	0.254991	0.128507	0.272727	0.548039
16ol	8al	0.20311	0.262417	0.333631	0.307892	0.289179	0.265084	0.499259	0.257664	0.136012	0.328845	0.439236
16ol	9al	0.241354	0.294246	0.358782	0.311777	0.296997	0.279365	0.482703	0.276088	0.124446	0.285825	0.478281
17ol	18ol	0.168785	0.184407	0.216471	0.26758	0.234353	0.256147	0.21406	0.246435	0.0905169	0.218388	0.436211
17ol	19ol	0.25643	0.233236	0.314393	0.21321	0.314008	0.279341	0.264036	0.176513	0.12398	0.387329	0.335148
17ol	26ol	0.255211	0.22113	0.251189	0.231417	0.220865	0.284717	0.198025	0.339083	0.101215	0.246023	0.351332
17ol	27ol	0.289542	0.205783	0.240156	0.167742	0.198338	0.63005	0.166941	0.323849	0.115649	0.177465	0.274988
17ol	28ol	0.267658	0.171485	0.157496	0.200968	0.175035	0.214046	0.212683	0.256226	0.130464	0.190763	0.250828
17ol	29ol	0.241855	0.2469	0.358506	0.228286	0.255343	0.24802	0.164233	0.235753	0.112338	0.26774	0.327463
17ol	26one	0.268979	0.36033	0.61091	0.318238	0.26114	0.280929	0.426531	0.362368	0.152145	0.336669	0.310388
17ol	27one	0.297551	0.238934	0.533556	0.232332	0.266855	0.305246	0.338236	0.280767	0.12499	0.443276	0.426379
17ol	28one	0.344772	0.222715	0.236801	0.225151	0.190385	0.293666	0.224464	0.185663	0.101054	0.325754	0.417129
17ol	29one	0.258758	0.243336	0.342264	0.19063	0.236114	0.315653	0.364316	0.240107	0.107884	0.292622	0.386555
17ol	6al	0.275564	0.261746	0.449598	0.271878	0.28578	0.270339	0.273759	0.366378	0.135946	0.430625	0.561202
17ol	7al	0.424621	0.221286	0.307968	0.281798	0.281442	0.285786	0.268036	0.33328	0.119272	0.307408	0.47458
17ol	8al	0.318256	0.233437	0.30873	0.278486	0.271779	0.279618	0.222452	0.250782	0.11609	0.249395	0.34951
17ol	9al	0.27526	0.24852	0.318397	0.279946	0.309537	0.254175	0.216153	0.307084	0.124582	0.321121	0.317811
18ol	19ol	0.182708	0.258618	0.162719	0.334648	0.175292	0.250361	0.194703	0.175667	0.0986885	0.284754	0.32045
18ol	26ol	0.259926	0.267658	0.309336	0.431988	0.321222	0.256466	0.25485	0.490226	0.100356	0.293962	0.276939
18ol	27ol	0.219429	0.279271	0.293238	0.334401	0.276095	0.518072	0.226766	0.485407	0.117896	0.207339	0.277385
18ol	28ol	0.226975	0.175974	0.199299	0.247648	0.158861	0.183568	0.208155	0.210783	0.113515	0.167091	0.35943
18ol	29ol	0.206336	0.271582	0.31839	0.36118	0.153865	0.146939	0.188754	0.15727	0.0922667	0.198564	0.331699
18ol	26one	0.285201	0.337042	0.607633	0.480768	0.313094	0.239584	0.418963	0.457763	0.16007	0.249087	0.376555
18ol	27one	0.230778	0.296205	0.543627	0.356639	0.31923	0.197131	0.395541	0.308378	0.129285	0.374051	0.271279
18ol	28one	0.268366	0.235322	0.229431	0.353008	0.284665	0.16106	0.266553	0.272779	0.0938826	0.229632	0.38124
18ol	29one	0.208929	0.218776	0.327083	0.284636	0.23351	0.191444	0.32241	0.175583	0.0988055	0.227049	0.230271
18ol	6al	0.247384	0.310002	0.467561	0.43198	0.326443	0.19226	0.32506	0.369284	0.122881	0.401425	0.703146
18ol	7al	0.420566	0.278155	0.330543	0.433793	0.325192	0.206678	0.333376	0.384179	0.119668	0.258701	0.269145
18ol	8al	0.2906	0.262279	0.245652	0.406048	0.253937	0.179938	0.218026	0.301096	0.119127	0.25798	0.338977
18ol	9al	0.205202	0.256947	0.212433	0.401036	0.205133	0.197369	0.197065	0.344444	0.112564	0.260956	0.315228
19ol	26ol	0.343218	0.296181	0.355205	0.27488	0.393533	0.389073	0.219176	0.407868	0.121517	0.393679	0.337875
19ol	27ol	0.241904	0.29798	0.369211	0.240131	0.356112	0.62759	0.21691	0.396719	0.147144	0.327799	0.286317
19ol	28ol	0.267417	0.291453	0.292432	0.264353	0.225761	0.241238	0.218863	0.237381	0.13532	0.288624	0.284018
19ol	29ol	0.284359	0.184308	0.386159	0.185625	0.183726	0.218172	0.254203	0.196292	0.0891881	0.236728	0.267302
19ol	26one	0.325218	0.416565	0.673846	0.335104	0.425676	0.285628	0.365724	0.404539	0.194605	0.305979	0.209917
19ol	27one	0.224457	0.252873	0.628171	0.307649	0.420913	0.304055	0.35744	0.303338	0.165931	0.448669	0.369469
19ol	28one	0.284345	0.245868	0.326837	0.278248	0.373582	0.312338	0.292335	0.20733	0.116634	0.332748	0.390089
19ol	29one	0.216659	0.3213	0.398972	0.256321	0.294381	0.231214	0.236742	0.208827	0.123219	0.266994	0.328785
19ol	6al	0.244011	0.278826	0.542798	0.299093	0.398925	0.327178	0.297788	0.34129	0.136485	0.318318	0.513221
19ol	7al	0.463961	0.220131	0.39698	0.309879	0.392954	0.362772	0.342348	0.338467	0.142157	0.315589	0.406163
19ol	8al	0.318514	0.265949	0.268748	0.26234	0.299151	0.305344	0.211075	0.240919	0.154822	0.380939	0.270089
19ol	9al	0.165598	0.242369	0.196756	0.273234	0.178406	0.246739	0.215687	0.297318	0.131936	0.218842	0.234583
26ol	27ol	0.297085	0.174415	0.182029	0.217843	0.208047	0.477505	0.136221	0.143797	0.11339	0.17431	0.201916
26ol	28ol	0.359356	0.261622	0.240908	0.300802	0.267378	0.280949	0.198646	0.39639	0.124223	0.261617	0.264093
26ol	29ol	0.279338	0.2401	0.35609	0.275915	0.32783	0.256045	0.239918	0.435579	0.108828	0.258936	0.331495
26ol	26one	0.31096	0.262809	0.553133	0.305227	0.252046	0.23382	0.341049	0.276819	0.133758	0.297937	0.317996
26ol	27one	0.320052	0.190621	0.504556	0.305431	0.245219	0.234416	0.286374	0.354046	0.114088	0.319807	0.217257
26ol	28one	0.325505	0.212482	0.263505	0.297925	0.219574	0.230997	0.256414	0.354225	0.112194	0.288378	0.347785
26ol	29one	0.250115	0.225368	0.306696	0.25563	0.295045	0.323336	0.259529	0.436856	0.112538	0.257271	0.2458
26ol	6al	0.266901	0.18189	0.370015	0.227422	0.261527	0.157638	0.210133	0.337314	0.127349	0.398015	0.60746
26ol	7al	0.455671	0.219333	0.265211	0.254465	0.272196	0.204427	0.25686	0.287349	0.121725	0.276411	0.263466
26ol	8al	0.341034	0.22847	0.299638	0.263387	0.261879	0.218536	0.197958	0.328649	0.117774	0.288785	0.240691
26ol	9al	0.316219	0.23293	0.303833	0.272351	0.347833	0.266981	0.232322	0.307444	0.127347	0.321959	0.263378
27ol	28ol	0.219442	0.243324	0.204225	0.228106	0.242084	0.506575	0.179881	0.404853	0.148309	0.173127	0.215436
27ol	29ol	0.220807	0.255834	0.260652	0.249998	0.277783	0.502054	0.205649	0.433928	0.136553	0.205601	0.278297
27ol	26one	0.276589	0.353375	0.459779	0.344821	0.273081	0.491868	0.338019	0.301838	0.15662	0.261568	0.281655
27ol	27one	0.158038	0.216872	0.396747	0.244577	0.297085	0.528663	0.280176	0.363463	0.140064	0.355057	0.245112
27ol	28one	0.188947	0.239691	0.210397	0.271141	0.221115	0.52118	0.224618	0.339387	0.145605	0.258482	0.375562
27ol	29one	0.208456	0.274463	0.236959	0.23537	0.294771	0.551294	0.287449	0.453165	0.132213	0.237971	0.258413
27ol	6al	0.213352	0.246446	0.292346	0.282612	0.311792	0.469186	0.244409	0.378718	0.142616	0.367308	0.573659
27ol	7al	0.352533	0.223041	0.267374	0.235625	0.285904	0.489611	0.279023	0.313511	0.129152	0.252181	0.322541
27ol	8al	0.21391	0.22711	0.310583	0.260701	0.249826	0.503839	0.209518	0.344624	0.124967	0.243328	0.272475
27ol	9al	0.198941	0.268408	0.337938	0.266201	0.314872	0.506166	0.233035	0.332967	0.136194	0.257487	0.234674
28ol	29ol	0.179753	0.280671	0.320289	0.284963	0.156209	0.173263	0.208749	0.157894	0.116792	0.202145	0.26036
28ol	26one	0.240606	0.355201	0.570144	0.417361	0.294783	0.20677	0.40053	0.346837	0.182451	0.280841	0.256251
28ol	27one	0.220456	0.269405	0.490834	0.323393	0.289219	0.243234	0.341015	0.212752	0.161123	0.385286	0.321313
28ol	28one	0.275653	0.243302	0.199509	0.312987	0.22464	0.236667	0.255178	0.273345	0.127238	0.242885	0.37504
28ol	29one	0.272481	0.246119	0.301715	0.237746	0.176523	0.245743	0.300658	0.188751	0.127551	0.23669	0.298543
28ol	6al	0.265803	0.284019	0.409601	0.349961	0.319648	0.227003	0.288002	0.276965	0.140555	0.403284	0.521063
28ol	7al	0.290918	0.25985	0.291633	0.358024	0.324292	0.257556	0.254699	0.304283	0.152651	0.286479	0.393691
28ol	8al	0.224651	0.260329	0.271487	0.316226	0.250971	0.225858	0.17911	0.270046	0.14231	0.266327	0.267103
28ol	9al	0.251393	0.281613	0.283644	0.328714	0.249704	0.181858	0.244596	0.259664	0.159625	0.269717	0.235719
29ol	26one	0.226046	0.357279	0.373437	0.293564	0.319002	0.221968	0.447311	0.384826	0.1809	0.239703	0.321006
29ol	27one	0.220587	0.208996	0.360501	0.277297	0.344007	0.216789	0.353247	0.244454	0.151419	0.354916	0.344421
29ol	28one	0.246435	0.212992	0.256837	0.23685	0.288097	0.199735	0.195363	0.249182	0.105246	0.253422	0.284871
29ol	29one	0.221063	0.26733	0.17867	0.255196	0.196953	0.189037	0.379754	0.167595	0.104497	0.19753	0.313389
29ol	6al	0.254515	0.233977	0.319383	0.269083	0.346749	0.210818	0.302908	0.343896	0.123345	0.342431	0.647253
29ol	7al	0.339141	0.216964	0.407327	0.309633	0.349482	0.248433	0.293945	0.366396	0.141232	0.26573	0.440296
29ol	8al	0.24252	0.251013	0.380151	0.261536	0.25116	0.219528	0.210426	0.294203	0.14067	0.285532	0.313108
29ol	9al	0.2625	0.225519	0.392241	0.278518	0.217819	0.195504	0.214774	0.291635	0.122796	0.224674	0.303845
26one	27one	0.263206	0.343941	0.187446	0.237161	0.168864	0.1746	0.282729	0.234562	0.0889697	0.36544	0.346156
26one	28one	0.306562	0.256747	0.460701	0.211082	0.216925	0.21832	0.372926	0.337564	0.151787	0.276596	0.436033
26one	29one	0.251414	0.228755	0.35068	0.337324	0.284416	0.26091	0.280549	0.367496	0.143675	0.229754	0.321573
26one	6al	0.212038	0.29077	0.304882	0.214229	0.252556	0.213063	0.337177	0.387317	0.189122	0.301125	0.427492
26one	7al	0.362816	0.364098	0.558784	0.336151	0.264316	0.286993	0.443894	0.399602	0.164077	0.276913	0.392508
26one	8al	0.267519	0.365275	0.601017	0.333274	0.304205	0.25186	0.400302	0.386312	0.153114	0.309532	0.262713
26one	9al	0.307934	0.348153	0.64535	0.347333	0.389195	0.244165	0.431881	0.343699	0.183926	0.272438	0.211574
27one	28one	0.198984	0.241022	0.380938	0.162942	0.172687	0.143888	0.229703	0.229205	0.117804	0.244367	0.353883
27one	29one	0.207886	0.277896	0.320937	0.256165	0.295013	0.216562	0.319336	0.23368	0.118176	0.333797	0.236654
27one	6al	0.218505	0.19919	0.255598	0.247611	0.284537	0.202089	0.243792	0.33821	0.171662	0.520183	0.658362
27one	7al	0.373415	0.178842	0.473558	0.283703	0.297097	0.269946	0.34417	0.351914	0.146071	0.383053	0.281547
27one	8al	0.226152	0.227039	0.535219	0.325291	0.333406	0.237829	0.319526	0.321629	0.13649	0.453042	0.308768
27one	9al	0.200179	0.233372	0.591693	0.329186	0.402351	0.270037	0.37574	0.314333	0.158006	0.432468	0.298822
28one	29one	0.177876	0.181847	0.195337	0.246805	0.237092	0.196344	0.354127	0.238174	0.0920613	0.217139	0.36885
28one	6al	0.246531	0.224906	0.340799	0.217934	0.30838	0.196198	0.251005	0.394332	0.146198	0.428199	0.775757
28one	7al	0.43801	0.230271	0.287736	0.283734	0.30454	0.243825	0.285757	0.373288	0.135881	0.287337	0.447461
28one	8al	0.283068	0.245204	0.302876	0.279457	0.298662	0.216388	0.239684	0.284211	0.12894	0.33329	0.354241
28one	9al	0.258553	0.22473	0.30887	0.27509	0.366456	0.247996	0.275932	0.319012	0.135393	0.301459	0.40772
29one	6al	0.184525	0.275254	0.266601	0.284438	0.335122	0.278644	0.306205	0.345995	0.141307	0.35517	0.641801
29one	7al	0.450848	0.286164	0.349369	0.312602	0.347416	0.315491	0.386052	0.386819	0.138065	0.294726	0.300136
29one	8al	0.287914	0.27413	0.345826	0.30358	0.263939	0.265633	0.294389	0.277471	0.122759	0.308107	0.310157
29one	9al	0.208355	0.251658	0.370679	0.301037	0.303924	0.256733	0.327746	0.304364	0.128541	0.248602	0.264262
6al	7al	0.402403	0.181912	0.330777	0.224202	0.14406	0.154905	0.222382	0.196445	0.11825	0.300843	0.645568
6al	8al	0.256972	0.221453	0.416515	0.255443	0.229908	0.14895	0.218339	0.252425	0.133826	0.368908	0.518728
6al	9al	0.223113	0.233932	0.483709	0.272887	0.318583	0.207794	0.26011	0.243312	0.118862	0.281833	0.516657
7al	8al	0.251219	0.186846	0.238473	0.227069	0.201226	0.169138	0.208694	0.24519	0.0970793	0.203074	0.308854
7al	9al	0.401717	0.214932	0.312413	0.235845	0.301921	0.236327	0.294245	0.267453	0.108624	0.226807	0.331778
8al	9al	0.225503	0.148126	0.147826	0.139592	0.208842	0.154671	0.175333	0.192588	0.104259	0.234135	0.19545
