# Supplementary material for: Multisite imaging of neural activity using a genetically encoded calcium sensor in the honey bee
Source: PLoS Biol. 2023 Jan 31;21(1):e3001984. doi: 10.1371/journal.pbio.3001984 (PMC9917304; doi:10.1371/journal.pbio.3001984)
Supplement: S3 Data — Data underlying Fig 5. (XLSX) [file pbio.3001984.s011.xlsx]

## Sheet: intensity MB
bees	HB1	HB2	HB3	HB4	HB5	HB6	HB7
16ol	0.124035	0.116852	0.32408	0.0497211	0.0971949	0.290505	0.0804122
7al	0.121151	0.103134	0.307504	0.00327196	0.119839	0.280532	0.0871777
8al	0.116791	0.12258	0.297326	0.0425077	0.0749647	0.299948	0.0884724
26one	0.0903908	0.119111	0.260564	0.0480562	0.102951	0.274513	0.0548888
27one	0.12485	0.118065	0.300692	0.025081	0.117111	0.283163	0.082439
air	0.0892606	0.0888323	0.245952	0.0332308	0.0754372	0.186211	0.0483207
